1 **The effect of dream report collection and dream incorporation on memory consolidation during**  
2 **sleep**

3 *Sarah F. Schoch<sup>a</sup>, Maren J. Cord<sup>b,c</sup>, Michael Schredl<sup>d</sup>, Björn Rasch<sup>b,c,\*</sup>*  
4

5

6

7

8 a. University of Zurich, CRPP Sleep and Health, Zurich, Switzerland

9 b. Zurich Center for Interdisciplinary Sleep Research (ZiS), University of Zurich, Zurich,  
10 Switzerland

11 c. University of Fribourg, Department of Psychology, Division of Biopsychology and Methods,  
12 Fribourg, Switzerland

13 d. Department of Psychiatry and Psychotherapy, Central Institute of Mental Health, Medical  
14 Faculty Mannheim, Heidelberg University, Mannheim, Germany

15 \*Corresponding author:

16 Björn Rasch, University of Fribourg, Department of Psychology, Division of Biopsychology and  
17 Methods, Rue P.A. de Faucigny 2, 1700 Fribourg, Phone: +41 26 300 7637, Fax: +41 26 300 9712,  
18 Email: Bjoern.rasch@unifr.ch

19 Running title: Dreaming and memory consolidation during sleep

20

21

22 Total number of words: 4986

23 Number of references: 30

24

25

26

27 Author contributorship:

28 SFS, MS and BR designed the study. SFS collected the data. SFS and MJC analyzed the data. SFS, MJC,  
29 MS and BR wrote the article.

30

31 Authors declare no conflict of interest.

32

33 **Abstract**

34 Waking up during the night to collect dream reports is a commonly used method to study dreams.  
35 This method has also been applied in studies on the relationship between dreams and memory  
36 consolidation. However, it is unclear if these awakenings influence ongoing memory consolidation  
37 processes. Furthermore, only few studies have examined if task incorporation into dreams is related  
38 to enhanced performance in the task. Here we compare memory performance in a word-picture  
39 association learning task after a night with (up to six awakenings) and without awakenings in 22  
40 young and healthy participants. We then examine if the task is successfully incorporated into the  
41 dreams and if this incorporation is related to the task performance the next morning.  
42 We show that while the awakenings impair both subjective and objective sleep quality, these  
43 awakenings did not impair ongoing memory consolidation during sleep. When dreams were collected  
44 during the night by awakenings, memories of the learning task were successfully incorporated into  
45 dreams. No incorporation occurred in dreams collected only in the morning. Task incorporation into  
46 NREM sleep dreams, but not REM sleep dreams showed a relationship with task performance the  
47 next morning.  
48 We conclude that the method of awakenings to collect dream reports is suitable for dream and  
49 memory studies, and is even crucial to uncover task incorporations. Furthermore, our study suggests  
50 that dreams in NREM rather than REM sleep might be related to processes of memory consolidation  
51 during sleep.

52

53

54

55

56

57

58

59

60

61

62

63

64 Keywords: REM, NREM, awakenings, sleep quality

65

66

67 **Introduction**

68 Current theories assume that sleep plays an active role in the process of memory consolidation. The  
69 active systems consolidation hypothesis states that memories are spontaneously reactivated and  
70 thereby redistributed between hippocampal and cortical storage sites during sleep (Born and  
71 Wilhelm, 2012). On the neural level, hippocampal reactivations occur mainly during slow-wave sleep  
72 (SWS) in rodents, and only to a lesser extent in REM sleep (Kudrimoti et al., 1999, Girardeau et al.,  
73 2017). Consequently, hippocampus-dependent declarative memories profit more from early sleep  
74 periods with high amounts of SWS (Marshall and Born, 2007). In addition, after learning a task where  
75 stimuli are linked with memory cues inducing memory reactivation by re-exposure during sleep  
76 (targeted memory reactivation) benefits are consistent when cues are presented during NREM sleep  
77 but less pronounced during REM sleep (Rasch et al., 2007, Rudoy et al., 2009, Schreiner et al., 2015).

78  
79 At first glance, memory reactivations might provide an obvious link to dreaming activity (Schredl,  
80 2017, Stickgold et al., 2001). The incorporation rate of autobiographical memories in later dreams is  
81 relatively high (Wamsley et al., 2010a, Stickgold et al., 2000, Malinowski and Horton, 2014).  
82 Dreaming occurs during both NREM and REM sleep stages, although NREM dreams are less frequent  
83 (38 - 67% vs. 75-83% in REM), shorter, less emotional and vivid (McNamara et al., 2010, Stickgold et  
84 al., 1994, Montangero, 2018). Baylor and Cavallero (2001) reported that the amount of episodic  
85 memories was higher in NREM compared to REM dream reports while there was no sleep stage  
86 dependency for semantic memories.

87  
88 While waking events are clearly incorporated into dreams (Schredl and Hofmann, 2003), it is still  
89 unclear whether incorporations are related to memory consolidation. To our knowledge, only two  
90 (non-pilot) studies have examined this question using awakenings and an episodic task. In Cipolli et  
91 al. (2004), participants listened to nonsense sentences before sleep. While previously delivered  
92 sentences were incorporated more often than non-presented sentences during dream reports  
93 collected from REM sleep, incorporations made no difference in recall in the morning. In contrast,  
94 Wamsley et al. (2010b) reported that the incorporation rate during dreams in a nap positively  
95 predicts later memory performance in a spatial memory task. However, the group that dreamed  
96 about the task was very small ( $n = 4$ ), and showed differences at baseline. A more general problem is  
97 that the acquisition of dreams requires repeated waking from sleep. So far it is unknown whether  
98 and how repeated collection of dream reports affects ongoing memory consolidation. Without  
99 knowing this basic effect, studies using dream collection techniques cannot be compared to most  
100 sleep and memory studies which typically examine undisturbed sleep periods.

101

102 The major aim of the current study was to examine the effect of dream report collection during sleep  
103 on memory consolidation. Additionally, we examined whether a word-image association task was  
104 incorporated into dreams and if this was related to next day memory performance. We hypothesized  
105 that repeated dream collection will disturb ongoing memory consolidation. In addition, we expected  
106 incorporations in NREM and REM sleep, but that only NREM dream incorporation will be positively  
107 related to next day memory performance.

108

## 109 **Methods**

110

### 111 *Participants*

112 Twenty-two healthy participants aged between 19 and 35 years ( $M = 23.32$ ,  $SD \pm 4.2$ ) completed the  
113 whole study (12 female). They met our inclusion criteria as defined in the supplementary material  
114 and received 200 CHF as reimbursement. All participants gave written informed consent. The study  
115 was approved by the ethics committee of the Department of Psychology, University of Zurich.

116

### 117 *Polysomnographic set up*

118 The polysomnographic recording consisted of electroencephalography (EEG), electrooculography  
119 (EOG), electromyography (EMG) and electrocardiography (ECG). EEG and EOG were measured with a  
120 128 channel high density geodesic sensor net from EGI. EMG was measured with two single  
121 electrodes. ECG was measured with a singular recording from two electrodes placed on the thorax.  
122 The data went through Net Amps 300 series amplifier of EGI and was recorded and presented on the  
123 screen with the program Netstation (Version 4.5.4). Impedances were kept below 50 k $\Omega$ .  
124 Participants were woken up through an intercom system from Monacor, which allowed the  
125 experimenter to hear and talk to the participants.

126

### 127 *Procedures*

128 After an adaptation night, the participants completed two experimental nights for which the  
129 participants arrived at 8 p.m. First, the polysomnography was applied. Around 9 p.m. participants  
130 started with the word-picture association learning task. After the first five blocks, they filled out two  
131 questionnaires (mood and sleep quality of the previous night), enabling a short pause between  
132 learning and recall. Then they completed the recall blocks of the task before going to bed around 11  
133 p.m. During the experimental condition of awakenings (Session A), the participants were woken up 3  
134 to 6 times during the night. Awakenings were based on sleep stage determined visually from the  
135 EEG. Three awakenings from NREM and three from REM sleep were prompted. Participants were  
136 immediately asked: "What went through your mind before you woke up?". They were then asked to

137 rate the emotionality of the content for positive and negative emotions. Participants got up at 7 a.m.  
138 in the morning and filled out a mood and sleep quality questionnaire. At the end of the session they  
139 completed the two recall blocks exactly as before sleep. In the other experimental night (non-  
140 awakening condition, B) participants were not woken up during sleep and were instructed to  
141 memorize as many dreams as possible and write them down after completing the questionnaires and  
142 memory task in the morning. Every participant remembered at least one dream. The order of  
143 awakening and non-awakening condition was counterbalanced. An overview of the procedure is  
144 depicted in Figure 1. More details on the procedure can be found in the supplementary materials.

145

146 ----- INSERT FIGURE 1 HERE-----

147

#### 148 *Word-Picture Association learning Task*

149 Memory performance was measured with a word-picture association learning task adapted from  
150 Lehmann et al. (2016b). In this task participants learned 100 neutral words, which were paired with  
151 50 neutral and 50 positive images from 3 categories (children, sports, animals vs water,  
152 transportation and food). After rating both the words and the pictures on valence and arousal the  
153 participants tried to learn as many picture-word pairs as possible in 3 blocks. Recall happened in two  
154 blocks, once with just valence ratings and a cued recall with open answers. The percentage of the  
155 correctly remembered word-picture pairs was used as a measure for memory performance.

156

#### 157 *Sleep and Dream Analysis*

158 The sleep stages were scored manually using the computer software SchlafAus 1.0 (Gais,  
159 unpublished). Raters followed the rules of the Manual for the Scoring of Sleep and Associated Events  
160 from the American Academy of Sleep Medicine (Iber et al., 2007).

161 Each dream was rated by two raters on appearance of the categories (children, sports, animals,  
162 water, transportation and food). Additionally, the dreams were rated on their realism, positive and  
163 negative feelings, number of mentioned people, acoustic perceptions, occurrences of laboratory- or  
164 experiment-related content and incorporation of the words used in the word-picture task. The inter-  
165 rater reliability was moderate to good ( $r_s = 0.557 - 0.739$ ,  $\kappa = 0.525 - 0.911$ ). To operationalize to  
166 which degree the categories of the memory task were incorporated into the dreams, an  
167 incorporation score was generated for both nights and picture sets, respectively. The congruent  
168 score reflects the number of categories that had appeared in the picture set that they had seen in  
169 the task before sleep; the incongruent score reflects the number of categories of the picture set used  
170 in the other experimental night and therefore represents a baseline of the amount of task-related  
171 categories that appeared by chance in the dreams. For each reported dream the number of

172 incorporated categories was counted (0-3) and then summed up per night. For the non-awakening  
173 condition all dreams reported in the morning were counted as one dream, for the awakening  
174 condition each report was counted as one dream. For the sleep stage-dependent analysis, only the  
175 sum of dreams that happened within the respective sleep stage was taken into account. An  
176 incorporation ratio was used to calculate the specific advantage of congruent (with the pictures  
177 presented before sleep) over incongruent items (pictures presented during the other night) during  
178 dreams in the night with awakenings and dream reports during the night (difference).

179

#### 180 2.4.2 Statistical Analysis

181 The data was analyzed using IBM SPSS Statistics 22 (Statistical Product and Service Solutions, IBM  
182 Corp., Armonk, New York) and RStudio (R version 3.1.3; R Core Team, 2015). Statistical analysis was  
183 done with repeated measure analysis of variance (ANOVA) and one-way ANOVAs. Post-hoc analyses  
184 were corrected with Tukey's HSD. Pairwise differences were examined using paired t-tests. For  
185 correlations, Pearson coefficients were used. Differences between the nights were examined using  
186 paired t-tests with Bonferroni corrected p-values. Significance level was set to  $P = .05$ .

187

#### 188 Results

##### 189 *The effect of dream report collection on memory performance*

190 As expected, collecting dream reports during the night strongly affected sleep quality: Compared to  
191 the night without awakenings, dream report collections during the night significantly reduced the  
192 amount of N2 and REM sleep, while it increased time spent awake after sleep onset, N1 sleep and N3  
193 latency (see Table 1). Thus, overall sleep efficiency was significantly reduced from  $94.19 \pm 1.06$  % in  
194 non-awakening nights to  $87.34 \pm 1.71$  % in nights with awakenings ( $P < .001$ ,  $d = 0.82$ , see Figure 2A).

195 ----- INSERT TABLE 1 HERE -----

196

197

198 In contrast to our hypothesis and despite the strong impairment of sleep, we did not observe any  
199 significant differences between the awakening and non-awakening night on memory performance  
200 ( $t_{(21)} = 1.08$ ,  $P = .29$ ,  $d = 0.23$ ). In the non-awakening nights,  $93.19 \pm 3.39$  % of the images  
201 remembered in the evening were retained, with the number of images remembered in the evening  
202 before sleep set to 100%. In the night with awakenings participants remembered descriptively even  
203 more images ( $97.18 \pm 1.61$  %) (see Figure 2B). Given our sample size of  $n = 22$ , an intersession  
204 correlation of  $r_s = .27$  and our alpha threshold of  $P = .05$ , we can exclude an effect size for  
205 independent samples with  $d = 0.70$  or higher of the influence of awakenings on memory

206 consolidation during sleep with a probability of 95%.

207 -----INSERT FIGURE 2 HERE-----

### 208 *Dream Characteristics*

209 In the night with awakenings, participants were awakened 121 times, of which 106 lead to dream  
210 reports. 50 of these dream reports were obtained in NREM sleep (79% dream recall rate) and 56 in  
211 REM sleep (97% dream recall rate). In the night without awakenings, one morning dream diary report  
212 per participant was collected (n=22). Additional details on dream characteristics are reported in the  
213 supplementary results.

### 214 *Incorporation of task into dreams*

215 Participants learned one image set before each experimental night (see methods and Figure 1). To  
216 test incorporation rates of images into dreams, we compared “congruent” with “incongruent”  
217 incorporations. We analyzed our data using a 2 x 2 repeated measures ANOVA with the within-  
218 subject factors night (awakening vs non-awakening) and set congruency (congruent vs incongruent).  
219 While we did not observe a main effect of set congruency ( $P > .25$ ), we observed a significant  
220 interaction between set congruency and night ( $F_{(1,21)} = 8.1, P = .01, \eta_p^2 = 0.28$ ) and a main effect of  
221 night ( $F_{(1,21)} = 21.27, P < .001, \eta_p^2 = 0.5$ ) with more incorporations in the night with awakenings.  
222 Follow-up analysis confirmed that in the night with awakenings, dream reports contained  
223 significantly more incorporations of the congruent set of categories learned before sleep ( $2.5 \pm 0.3$   
224 incorporations) as compared to the incongruent set ( $1.77 \pm 0.27$  incorporations;  $t_{(21)} = 2.67, P = .014,$   
225  $d = 0.57$ ; see Figure 2A). In contrast in the nights with no awakenings, dream reports collected in the  
226 morning did not differ in the number of congruent vs. incongruent incorporations ( $t_{(21)} = -1.70, P =$   
227  $.10, d = 0.36$ , see Figure 2B.)

228 We further split the night with awakenings into awakenings from NREM and REM sleep stage.  
229 However, we only found a main effect of set congruency with more incorporation of the congruent  
230 set  $F_{(1,21)} = 7.11, P = .014 (\eta_p^2 = 0.25)$ , but no main effect of sleep stage or interaction between sleep  
231 stage and set congruency (all  $P \geq .64$ ). Thus, in both NREM and REM sleep, congruent incorporations  
232 were similarly higher as compared to incongruent incorporations.

233 ----- INSERT FIGURE 3 HERE -----

234

235

236 *Relationship between Dream Incorporation and Retention Performance*

237 We tested whether there was a positive relation between incorporation of congruent vs incongruent  
238 items of the learning task into dreams (indicated by the incorporation rate ratio between congruent  
239 and incongruent incorporations) and memory performance (measured by the relative retention  
240 score). To account for the higher chance of incorporations with more or longer dreams during REM  
241 as compared to NREM sleep, we included the amount of dreams and amount of words as covariates  
242 in a partial correlation. In accordance with our hypothesis, we observed a significant positive  
243 correlation between the ratio of congruent and incongruent dreams in NREM and overnight memory  
244 retention  $r = .49$ ,  $P = .02$ . In contrast during REM sleep the correlation was not significant ( $r = -.02$   $P >$   
245  $.90$ , see Figure 4). The difference between the two correlation coefficients for NREM and REM sleep  
246 was on a trend level ( $z = 1.71$ ,  $P = .087$ ). The correlation was also not significant in the night with no  
247 awakenings, where the dreams were collected in the morning ( $r = .11$ ,  $P = .61$ )

248

249 ----- INSERT FIGURE 4 HERE -----

250

251 Discussion

252 Our results indicate that dream report collection during sleep does not generally disturb overnight  
253 memory retention, despite impairments in sleep efficiency. Thus, memory consolidation might be  
254 comparable between nights with and without awakenings. In addition, we show that incorporation of  
255 learning stimuli into dreams reliably occurs only during dreams collected by awakenings from sleep.  
256 Finally, higher incorporation ratios of learning stimuli in NREM dreams, but not REM dreams,  
257 predicted better overnight memory retention. Our results suggest that processes of memory  
258 consolidation and reactivation during sleep might be related to dreaming during NREM sleep.

259

260 *The effect of the nocturnal awakenings on sleep-associated memory consolidation*

261 While the awakenings impaired the objective and subjective sleep quality of the participants, they  
262 did not impair memory consolidation. Relative reductions of slow-wave sleep using procedures like  
263 the night-half paradigm (e.g. Plihal and Born, 1997) have shown that the amount of SWS might be  
264 particularly important consolidation of declarative information during sleep. Furthermore, some  
265 studies reported positive correlations between the amount of SWS and declarative memory  
266 consolidation across sleep (Backhaus et al., 2007), although this has not been consistently observed  
267 (e.g. Ackermann et al., 2015). As the amount of SWS was significantly lower in the night with  
268 awakenings, one might have expected impaired memory consolidation. However, memory  
269 performance was descriptively even better in the night with awakenings. It is possible that recalling



270 dreams during the night represented additional processing of the task stimuli, thereby compensating  
271 for possible sleep quality impairments.

272 In sum, our study suggests that using up to six awakenings per night to collect dream reports does  
273 not significantly impair memory consolidation during sleep and can be used as a method to study  
274 dreams and their relationship with memory performance. However, limitations of possible additional  
275 task-related processing by repeatedly reporting dreams which might be related to the memory task  
276 apply.

277

#### 278 *Incorporation of the task into dreams*

279 We found that the picture set used in the task before sleep was incorporated significantly more often  
280 than the other picture set, but only if dream reports were collected by awakenings. This is an  
281 important methodological finding, as it underlines the importance of collecting dream reports via  
282 awakenings. Possibly, as dream reports in the morning only reflect a small part of the dreams that  
283 were experienced during the whole night, the remembered subset of dreams might not be  
284 representative of the whole night. A case study in one volunteer showed that both recency and  
285 intensity influenced which REM dream that was reported in the night was recalled again in the  
286 morning (Meier et al., 1968). In addition, since REM sleep stage is more prominent in the morning, it  
287 is also likely that dream reports collected in the morning rather reflect REM than NREM dreams.

288

289 While increased incorporation of the task stimuli appeared in dream reports collected via  
290 awakenings, we found no significant differences in the incorporation rate between NREM and REM  
291 dreams. According to the active system consolidation hypothesis, declarative memories are mainly  
292 re-activated during NREM sleep, while evidence for hippocampal reactivation during REM sleep is  
293 rather scarce (see Rasch and Born, 2013 for an overview). A recent study examining pattern replay in  
294 hippocampo-amygdala cell assemblies even report no signs of reactivations in REM sleep, in contrast  
295 to robust replay events during NREM sleep (Girardeau et al., 2017). Along similar lines, targeted  
296 memory reactivation during REM sleep did neither improve emotional nor neutral declarative  
297 memories, while TMR during NREM sleep improved memory for pictures (Lehmann et al., 2016a).

298 Note that we used an almost an identical word-picture association task in the current study as  
299 Lehmann et al. (2016a). If processes of memory reactivation and dreams would be closely related, we  
300 would have expected also higher incorporation rates of our word-picture associations task in NREM.  
301 Indeed, Baylor and Cavallero (2001) reported increased incorporation of episodic memories in dream  
302 reports obtained from NREM. Possibly, the involved memory system plays a role for incorporations.  
303 Future studies will need to examine what characteristics of the task and self-relevance for the stimuli  
304 influence incorporation rates in NREM vs. REM dreams (Hoelscher et al., 1981).

305

306 *Dream incorporation and relationship with task performance*

307 Although incorporation rates were similar between REM and NREM sleep, we found that only NREM  
308 incorporations have a positive relationship with task performance in the next morning. This is in line  
309 with the two previous studies, reporting no relation between performance and REM incorporations  
310 (Cipolli et al., 2004) and a strong association between performance and NREM incorporations  
311 (Wamsley et al., 2010b). It is possible that NREM and REM dreams reflect different mechanisms and  
312 that only NREM dreams are indicative of memory processes that take place during sleep. This also fits  
313 with the assumption of the active system consolidation hypothesis that replay mainly takes place in  
314 NREM sleep, and therefore the subjective reflection of this process also appears in this sleep stage.  
315 Our findings suggest that the association between mechanism of memory replay and dreaming might  
316 be stronger during NREM as compared to REM sleep. However, further studies are necessary to  
317 examine this notion more systematically.

318 *Limitations*

319 A major limitation of our study is that we examined only dreams occurring during the first night after  
320 the memory task. According to the dream-lag effect, daily experiences get incorporated into dreams  
321 with a lag of several days (Nielsen and Powell, 1989), which might be specific to REM dreams (van  
322 Rijn et al., 2015). It is possible that incorporation into REM sleep was higher the days following the  
323 experiment, and that these incorporations would reflect ongoing memory processes. However, it is  
324 also methodologically challenging to disentangle the contributions of several nights of sleep,  
325 forgetting over time and incorporations into dreams during multiple nights to processes of memory  
326 consolidation. Another limiting factor is our sample size. While the sample size was clearly sufficient  
327 to detect differences in our within-subject design, it is not sufficient to analyze differences and  
328 associations between participants in detail (e.g. examine single items and categories in detail).

329 *Conclusion and future research*

330 Here we showed that the awakenings used in dream research do not impair memory performance in  
331 an overnight task and are crucial to uncover incorporations of task into dreams. Our results support  
332 the notion that only NREM dreams might reflect ongoing memory processes, suggesting possible  
333 links between processes of memory reactivation / consolidation and dreams during NREM sleep. One  
334 might speculate that incorporation of memories during REM sleep dreams might rather support  
335 some sort of emotional processing and re-evaluation. However, the relation between processes of  
336 memory consolidation and NREM vs. REM sleep dreams clearly warrants further systematic

337 examination.

338 Acknowledgement

339 This work was supported by the Clinical Research Priority Program ‘Sleep and Health’ and of the  
340 University of Zurich, a grant from the Swiss National Science Foundation (SNF 100014\_162388 and  
341 POZHP1\_178697) and the European Research Council (ERC) under the European Union's Horizon  
342 2020 research and innovation program (grant agreement n° 677875). We thank Ilja Nefjodov and  
343 Maxime Hansen for coding the dreams and Daniel Erlacher for the support.

344

345

346 Ackermann, S., Hartmann, F., Papassotiropoulos, A., De Quervain, D. J. F. and Rasch, B. No  
347 Associations between Interindividual Differences in Sleep Parameters and Episodic Memory  
348 Consolidation. *Sleep*, 2015, 38: 951-U263.

349 Backhaus, J., Born, J., Hoeckesfeld, R., Fokuhl, S., Hohagen, F. and Junghanns, K. Midlife decline in  
350 declarative memory consolidation is correlated with a decline in slow wave sleep. *Learning &*  
351 *memory (Cold Spring Harbor, N.Y., 2007, 14: 336-41.*

352 Baylor, G. W. and Cavallero, C. Memory sources associated with REM and NREM dream reports  
353 throughout the night: A new look at the data. *Sleep*, 2001, 24: 165-70.

354 Born, J. and Wilhelm, I. System consolidation of memory during sleep. *Psychol Res-Psych Fo*, 2012,  
355 76: 192-203.

356 Cipolli, C., Fagioli, I., Mazzetti, M. and Tuozzi, G. Incorporation of presleep stimuli into dream  
357 contents: evidence for a consolidation effect on declarative knowledge during REM sleep? *J*  
358 *Sleep Res*, 2004, 13: 317-26.

359 Girardeau, G., Inema, I. and Buzsáki, G. Reactivations of emotional memory in the hippocampus–  
360 amygdala system during sleep. *Nat Neurosci*, 2017, 20: 1634.

361 Hoelscher, T. J., Klinger, E. and Barta, S. G. Incorporation of Concern-Related and Nonconcern-  
362 Related Verbal Stimuli into Dream Content. *Journal of Abnormal Psychology*, 1981, 90: 88-91.

363 Iber, C., Ancoli-Israel, S., Chesson, A. L. and Quan, S. F. The AASM Manual for the Scoring of Sleep  
364 and Associated Events: Rules, Terminology and Technical Specifications. In. American  
365 Academy of Sleep Medicine, Westchester, Illinois, 2007.

366 Kudrimoti, H. S., Barnes, C. A. and McNaughton, B. L. Reactivation of hippocampal cell assemblies:  
367 effects of behavioral state, experience, and EEG dynamics. *J Neurosci*, 1999, 19: 4090-101.

368 Lehmann, M., Schreiner, T., Seifritz, E. and Rasch, B. Emotional arousal modulates oscillatory  
369 correlates of targeted memory reactivation during NREM, but not REM sleep. *Scientific*  
370 *Reports*, 2016a, 6

371 Lehmann, M., Seifritz, E. and Rasch, B. Sleep benefits emotional and neutral associative memories  
372 equally. *Somnologie*, 2016b, 20: 47-53.

373 Malinowski, J. E. and Horton, C. L. Memory sources of dreams: the incorporation of autobiographical  
374 rather than episodic experiences. *J Sleep Res*, 2014, 23: 441-7.

- 375 Marshall, L. and Born, J. The contribution of sleep to hippocampus-dependent memory consolidation.  
376 *Trends Cogn Sci*, 2007, 11: 442-50.
- 377 Mcnamara, P., Johnson, P., McLaren, D., Harris, E., Beauharnais, C. and Auerbach, S. Rem and Nrem  
378 Sleep Mentation. *Int Rev Neurobiol*, 2010, 92: 69-86.
- 379 Meier, C. A., Ruef, H., Ziegler, A. and Hall, C. S. Forgetting of Dreams in Laboratory. *Percept Motor*  
380 *Skill*, 1968, 26: 551-&.
- 381 Montangero, J. Dreaming and REM-sleep: History of a scientific denial whose disappearance entailed  
382 a reconciliation of the neuroscience and the cognitive psychological approaches to dreaming.  
383 *International Journal of Dream Research*, 2018, 11: 30-45.
- 384 Nielsen, T. A. and Powell, R. A. The" dream-lag" effect: A 6-day temporal delay in dream content  
385 incorporation. *Psychiatric Journal of the University of Ottawa*, 1989
- 386 Plihal, W. and Born, J. Effects of early and late nocturnal sleep on declarative and procedural memory.  
387 *J Cognitive Neurosci*, 1997, 9: 534-47.
- 388 Rasch, B. and Born, J. About Sleep's Role in Memory. *Physiol Rev*, 2013, 93: 681-766.
- 389 Rasch, B., Buechel, C., Gais, S. and Born, J. Odor cues during slow-wave sleep prompt declarative  
390 memory consolidation. *Science*, 2007, 315: 1426-29.
- 391 Rudoy, J. D., Voss, J. L., Westerberg, C. E. and Paller, K. A. Strengthening individual memories by  
392 reactivating them during sleep. *Science*, 2009, 326: 1079.
- 393 Schredl, M. Is Dreaming Related to Sleep-Dependent Memory Consolidation? In), *Cognitive*  
394 *Neuroscience of Memory Consolidation*. Springer, 2017: 173-82.
- 395 Schredl, M. and Hofmann, F. Continuity between waking activities and dream activities. *Conscious*  
396 *Cogn*, 2003, 12: 298-308.
- 397 Schreiner, T., Lehmann, M. and Rasch, B. Auditory feedback blocks memory benefits of cueing during  
398 sleep. *Nat Commun*, 2015, 6: 8729.
- 399 Stickgold, R., Hobson, J. A., Fosse, R. and Fosse, M. Sleep, learning, and dreams: Off-line memory  
400 reprocessing. *Science*, 2001, 294: 1052-57.
- 401 Stickgold, R., Malia, A., Maguire, D., Roddenberry, D. and O'connor, M. Replaying the game:  
402 Hypnagogic images in normals and amnesics. *Science*, 2000, 290: 350-53.
- 403 Stickgold, R., Paceschott, E. and Hobson, J. A. A New Paradigm for Dream Research - Mentation  
404 Reports Following Spontaneous Arousal from Rem and Nrem Sleep Recorded in a Home  
405 Setting. *Conscious Cogn*, 1994, 3: 16-29.
- 406 Van Rijn, E., Eichenlaub, J.-B., Lewis, P. A. et al. The dream-lag effect: selective processing of  
407 personally significant events during rapid eye movement sleep, but not during slow wave  
408 sleep. *Neurobiol Learn Mem*, 2015, 122: 98-109.
- 409 Wamsley, E. J., Perry, K., Djonlagic, I., Reaven, L. B. and Stickgold, R. Cognitive Replay of  
410 Visuomotor Learning at Sleep Onset: Temporal Dynamics and Relationship to Task  
411 Performance. *Sleep*, 2010a, 33: 59-68.
- 412 Wamsley, E. J., Tucker, M., Payne, J. D., Benavides, J. A. and Stickgold, R. Dreaming of a Learning  
413 Task Is Associated with Enhanced Sleep-Dependent Memory Consolidation. *Curr Biol*, 2010b,  
414 20: 850-55.
- 415



**A)**

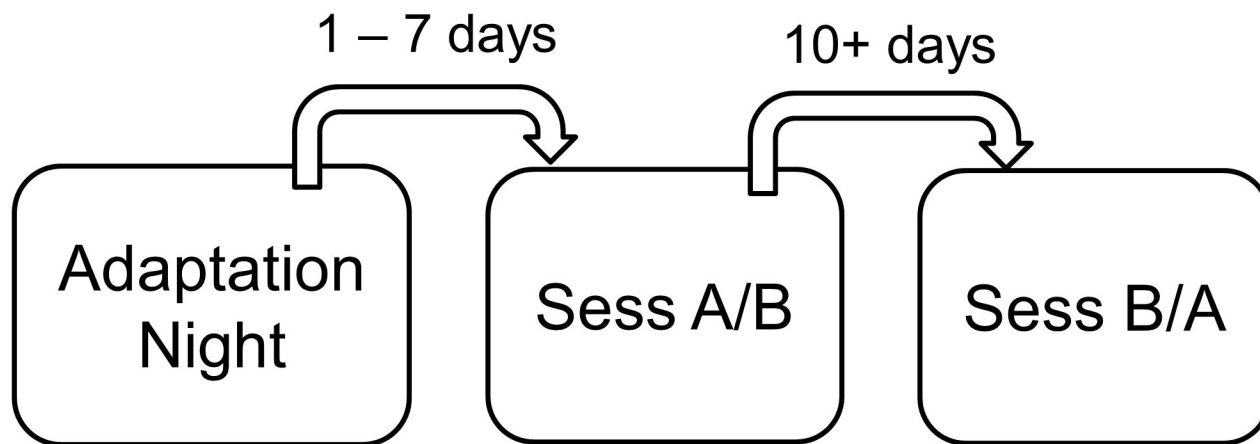

**B)**

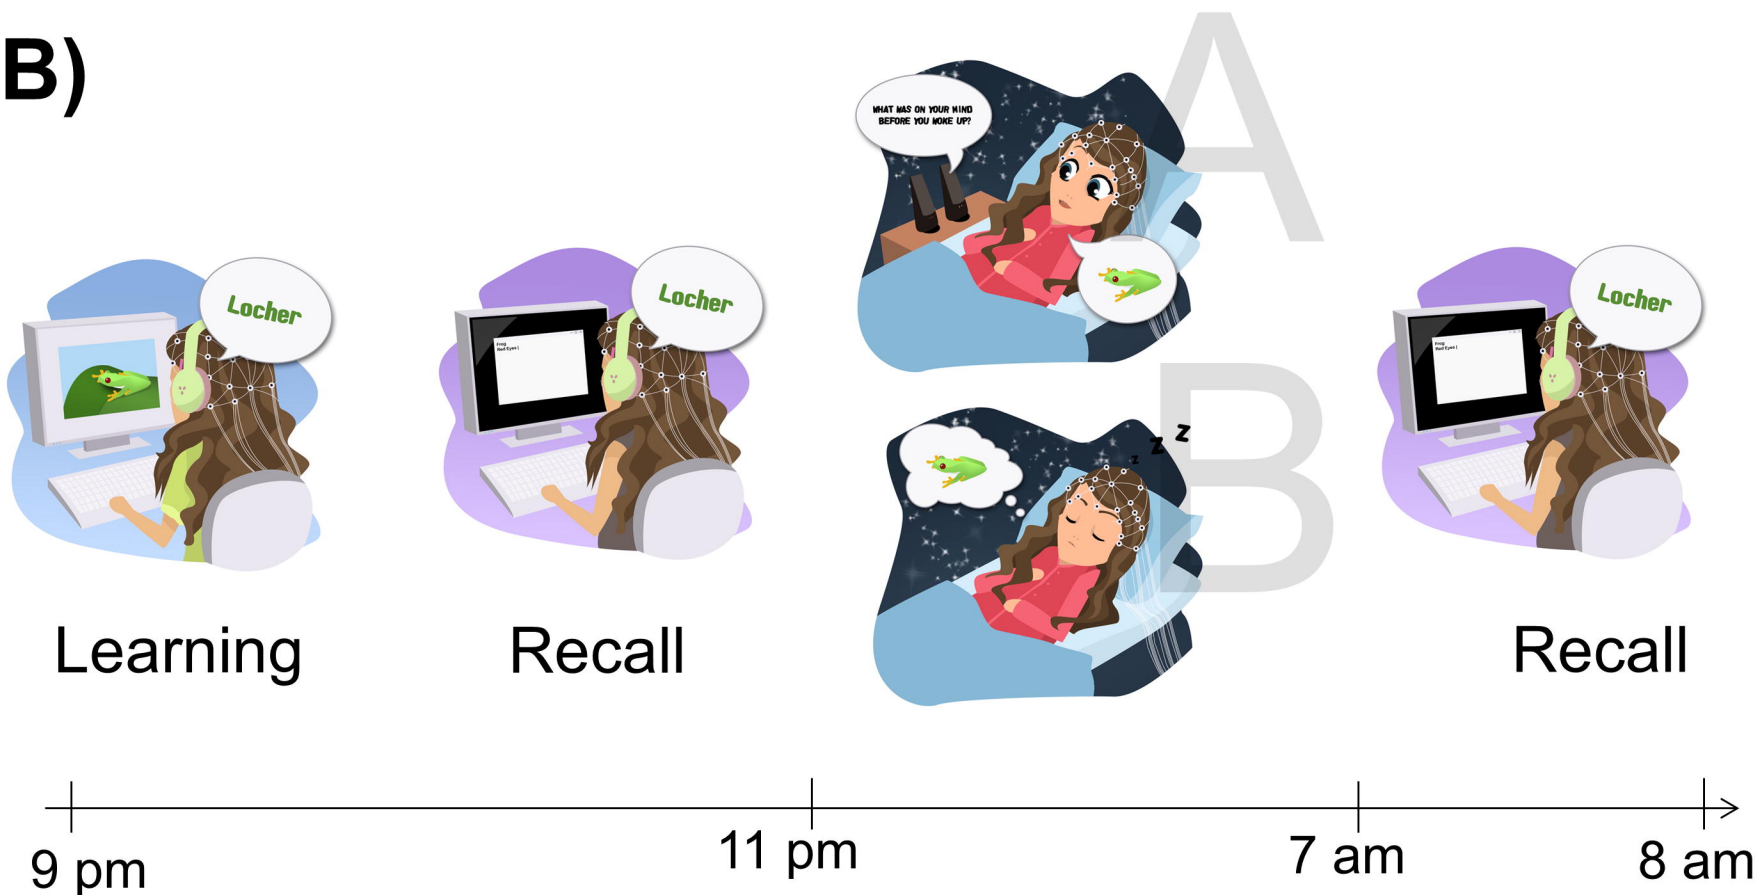

**A**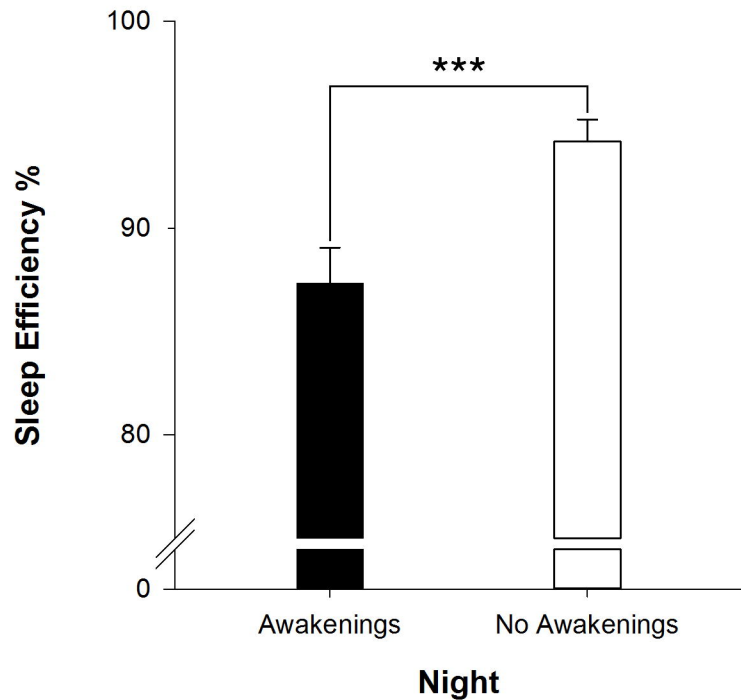**B**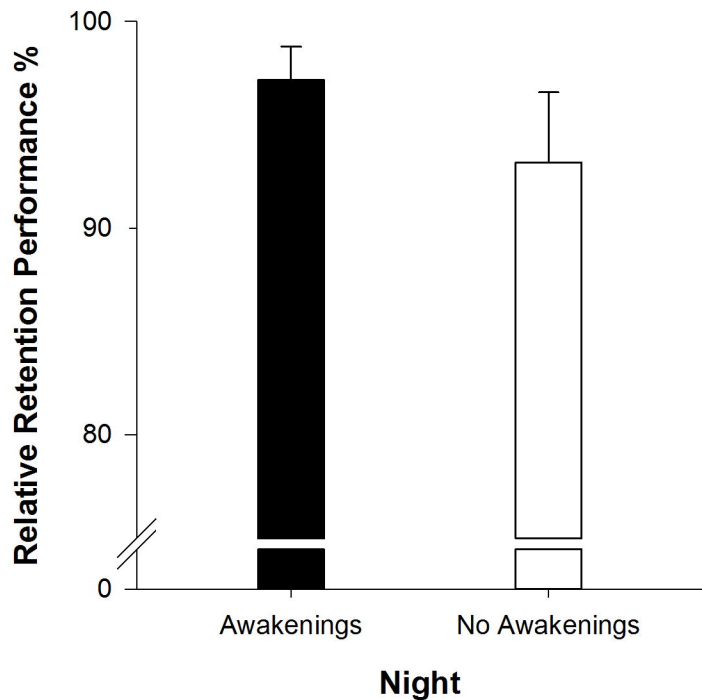

**A****Mean Incorporation Score**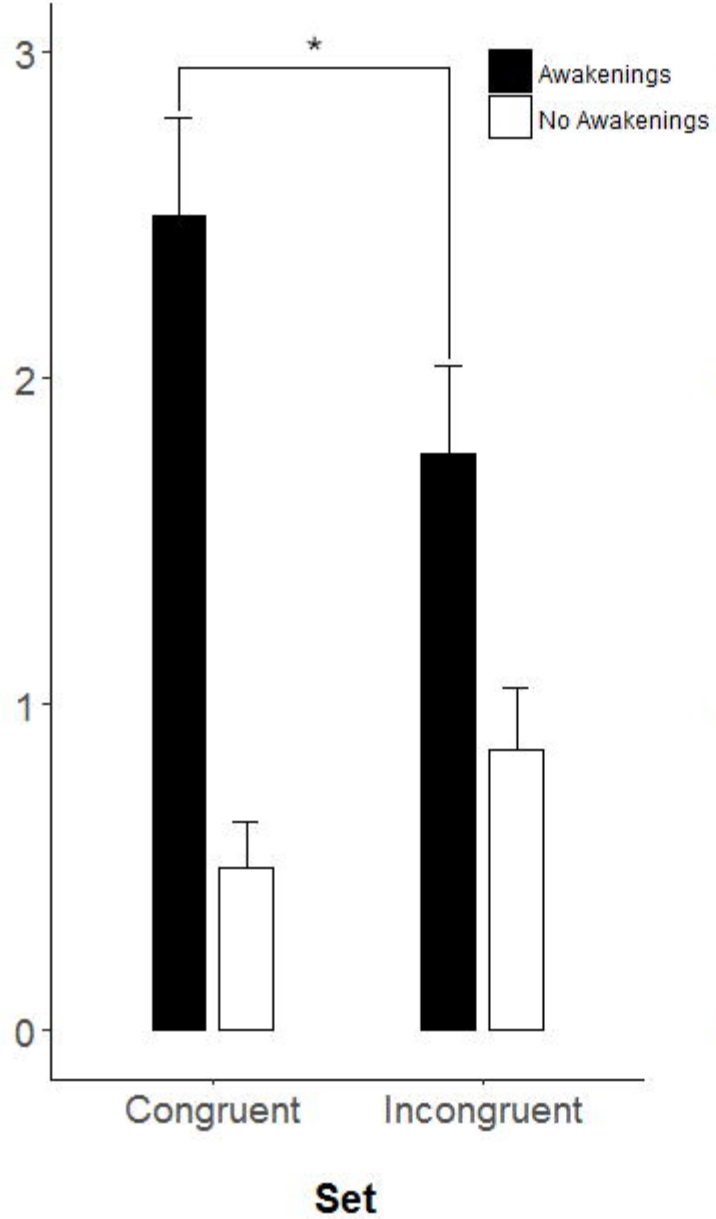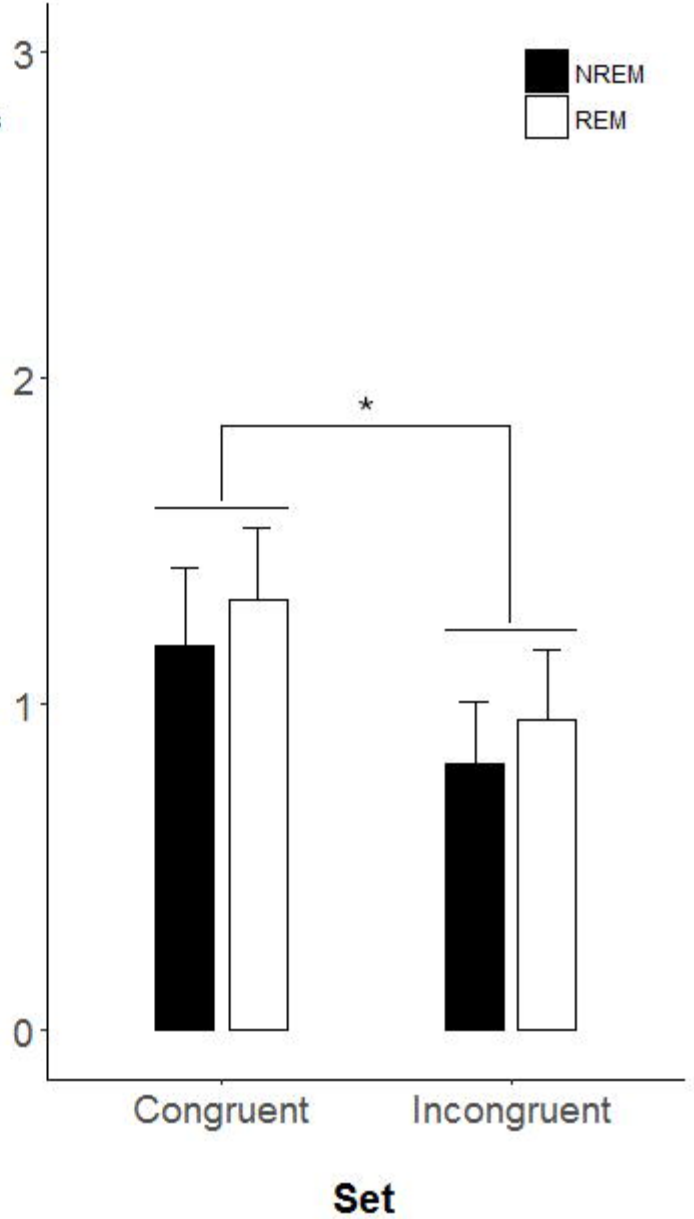



A

## NREM Sleep

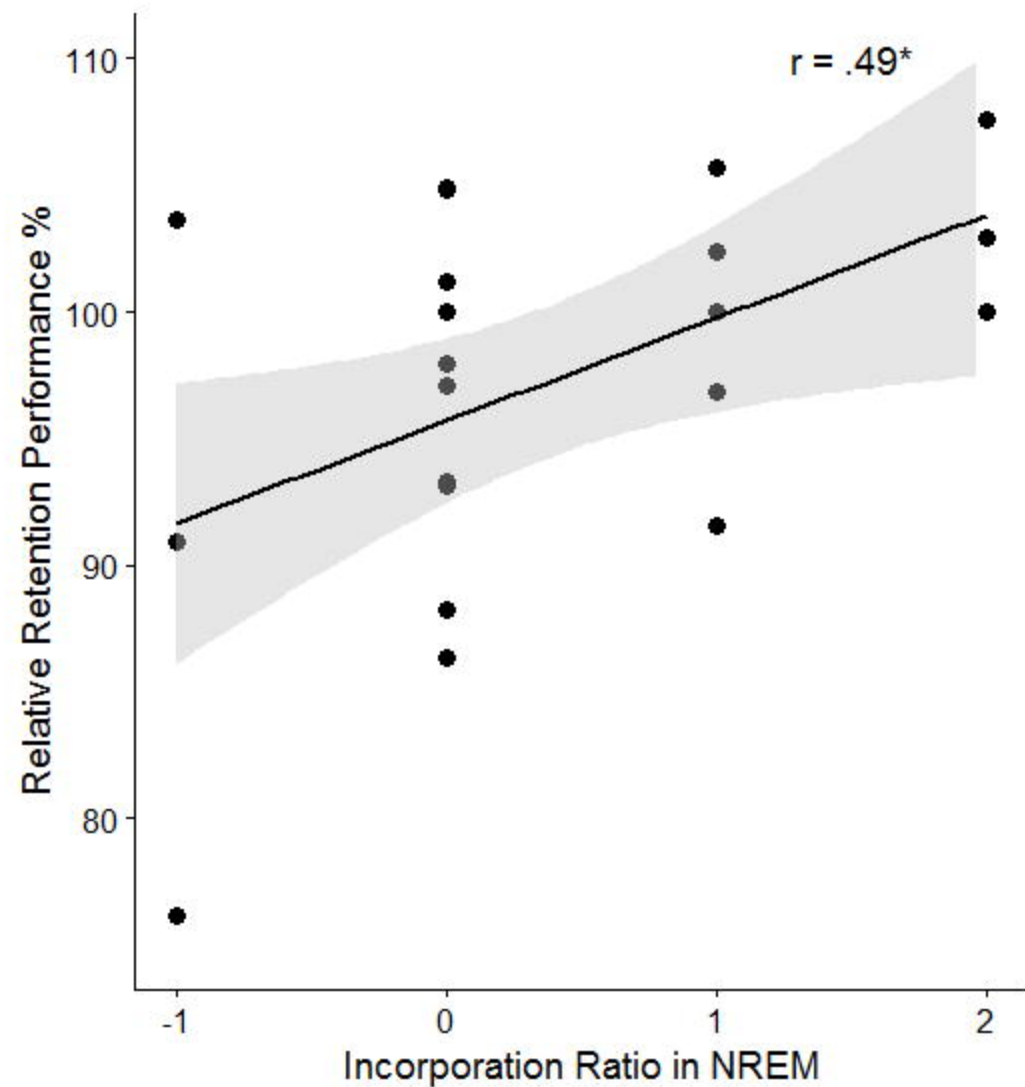

B

## REM Sleep

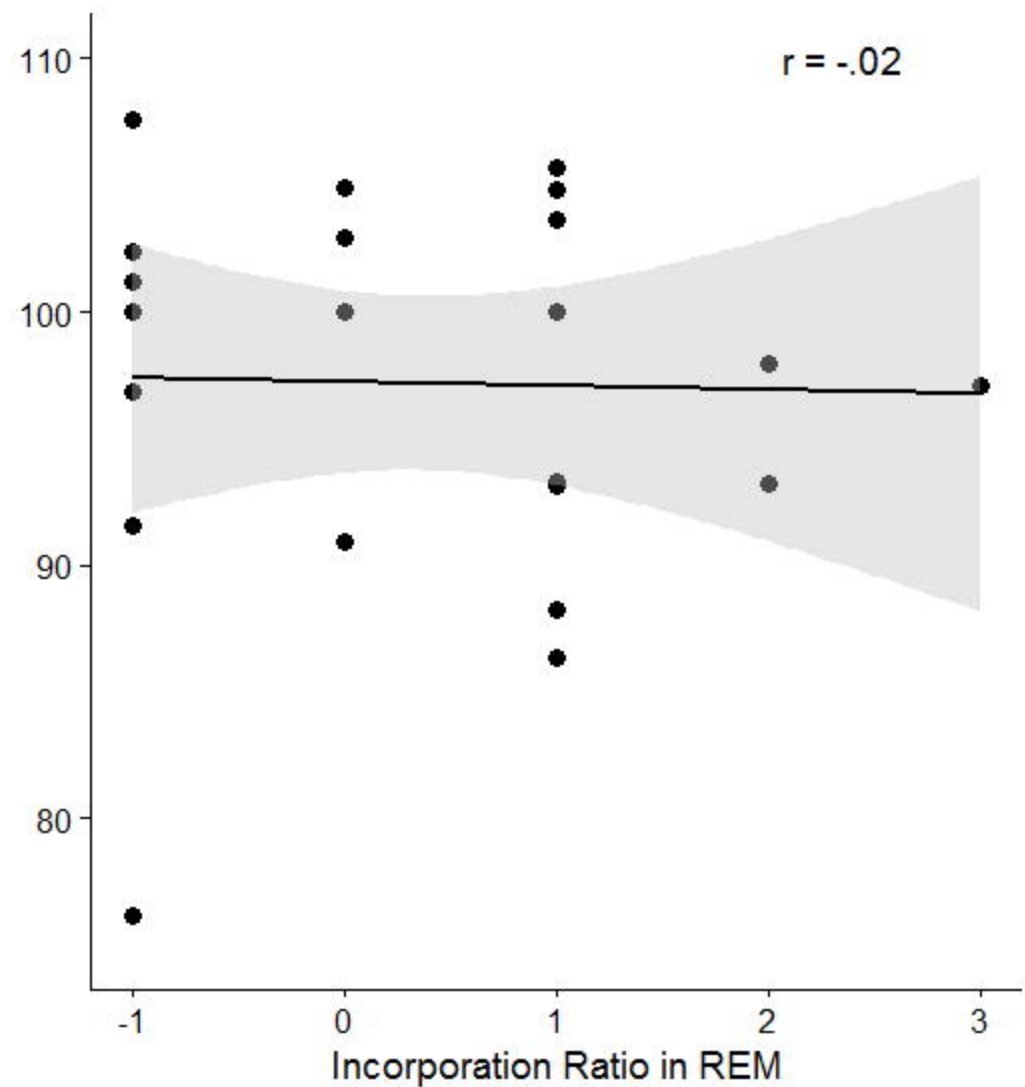

|                     | Awakening |         | Non-awakening |         | P      | <i>Table 1.</i><br><i>Comparison of</i><br><i>Objective</i> |
|---------------------|-----------|---------|---------------|---------|--------|-------------------------------------------------------------|
|                     | M         | SEM     | M             | SEM     |        |                                                             |
| Total (min)         | 468.67    | ±4.74   | 454.29        | ± 8.88  | .124   | <i>Sleep</i>                                                |
| Awake (%)           | 10.43     | ± 1.53  | 2.10          | ± 0.73  | <.001* | <i>Characteristic</i>                                       |
| N1 (%)              | 7.08      | ± 0.9   | 4.61          | ± 0.7   | <.001* | <i>s of the</i>                                             |
| N2 (%)              | 52.84     | ± 1.55  | 54.72         | ± 1.22  | .27    | <i>Experimental</i>                                         |
| N3 (%)              | 13.75     | ± 0.89  | 16.93         | ± 0.64  | .007   | <i>Nights</i>                                               |
| REM (%)             | 15.9      | ± 0.88  | 21.61         | ± 1.15  | <.001* |                                                             |
| Sleep latency (min) | 12.19     | ± 2.63  | 17.36         | ± 4.03  | .21    |                                                             |
| SWS latency (min)   | 34.43     | ± 3.88  | 16.24         | ± 1.1   | <.001* |                                                             |
| REM latency (min)   | 123.76    | ± 13.64 | 95.5          | ± 11.68 | .073   |                                                             |
| Sleep efficiency    | 87.34     | ± 1.71  | 94.19         | ± 1.06  | <.001* |                                                             |

Note: Standard error of the means are reported. \* Significant after Bonferroni correction.
